# Supplementary material for: A tunable refractive index matching medium for live imaging cells, tissues and model organisms
Source: eLife journal article supplement (doi:10.7554/elife.27240), 2017-07-14
Supplement: supp [file elife_poa_e27240_Figure_4_Figure_Supplement_2.pdf › elife_poa_e27240_Figure_4_Figure_Supplement_2.pdf]

Is the refractive index of the sample known?

Yes

No

Dilute Iodixanol to  
match RI

Determine tissue RI by phase contrast imaging  
Loss of contrast indicates RI match

$$RI_{(\text{media})} \approx 0.0016 \cdot c_{(\% \text{ Iodixanol})} + 1.333$$

$$c_{(\% \text{ Iodixanol})} \approx \frac{RI_{(\text{media})} - 1.333}{0.0016}$$

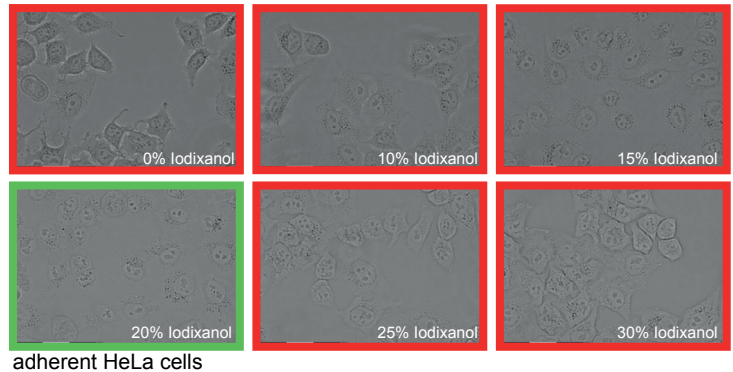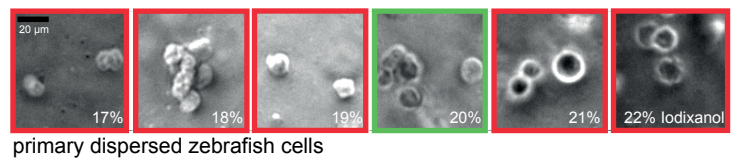

Figure 4 - Supplement 2
