# Supplementary material for: A tunable refractive index matching medium for live imaging cells, tissues and model organisms
Source: eLife. 2017 Jul 14;6:e27240. doi: 10.7554/eLife.27240 (PMC5582871; doi:10.7554/eLife.27240)
Supplement: Supplementary file 1. — Errors are S.E.M, N = 20. DOI: http://dx.doi.org/10.7554/eLife.27240.016 [file elife-27240-supp1.xlsx]

## Sheet: Sheet1
Objective	100x NA 1.35 Sil UPlanSApo				30x NA 1.05 Sil UPlanSApo
Condition	in vitro; 5µm - 50µm depth				in vivo; 20 µm depth		in vivo; 150 µm depth
Excitation [nm]	488		638		638		638
RI media	1.33	1.4	1.33	1.4	1.33	1.363	1.33	1.363
Lateral resolution [nm]	328 ± 15	254 ± 5	426 ± 18	270 ± 6	716 ± 22	744 ± 18	918 ± 50	792 ± 28
Axial resolution [nm]	886 ± 26	576 ± 10	1280 ± 26	710 ± 12
