# Supplementary figures and images for: A tunable refractive index matching medium for live imaging cells, tissues and model organisms
Source: eLife journal article supplement (doi:10.7554/elife.27240), 2017-07-14

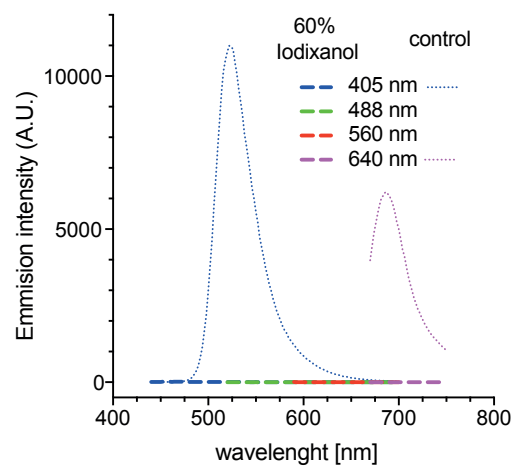

Figure 1 - Supplement 1

Supplement: supp [file elife_poa_e27240_Figure_1_Figure_Supplement_1.pdf › elife_poa_e27240_Figure_1_Figure_Supplement_1.pdf]

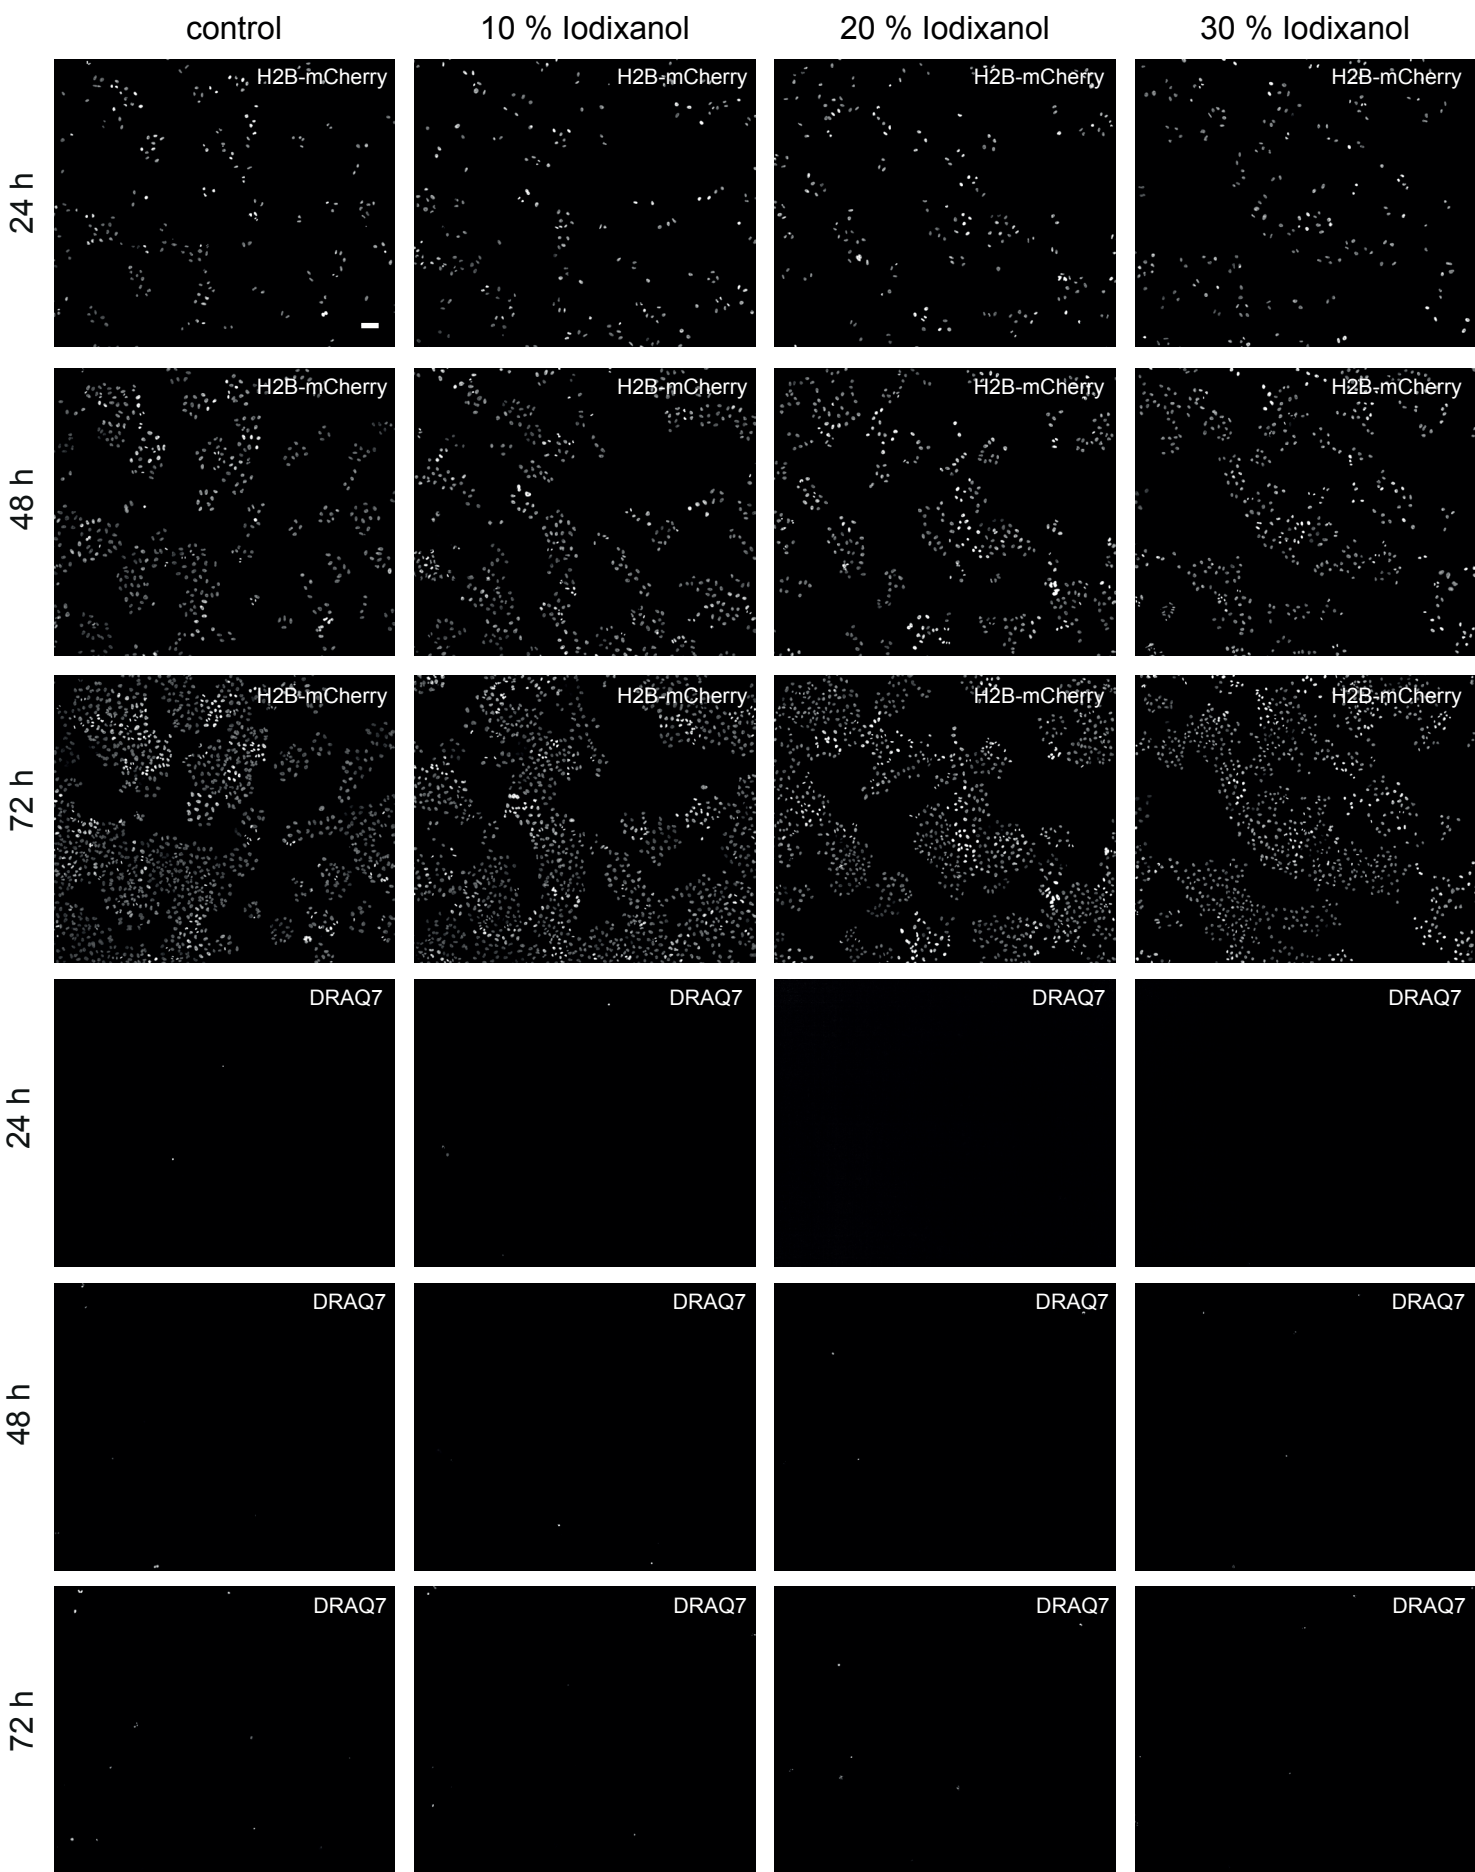

**Figure 2 - Supplement 1**

Supplement: supp [file elife_poa_e27240_Figure_2_Figure_Supplement_1.pdf › elife_poa_e27240_Figure_2_Figure_Supplement_1.pdf]

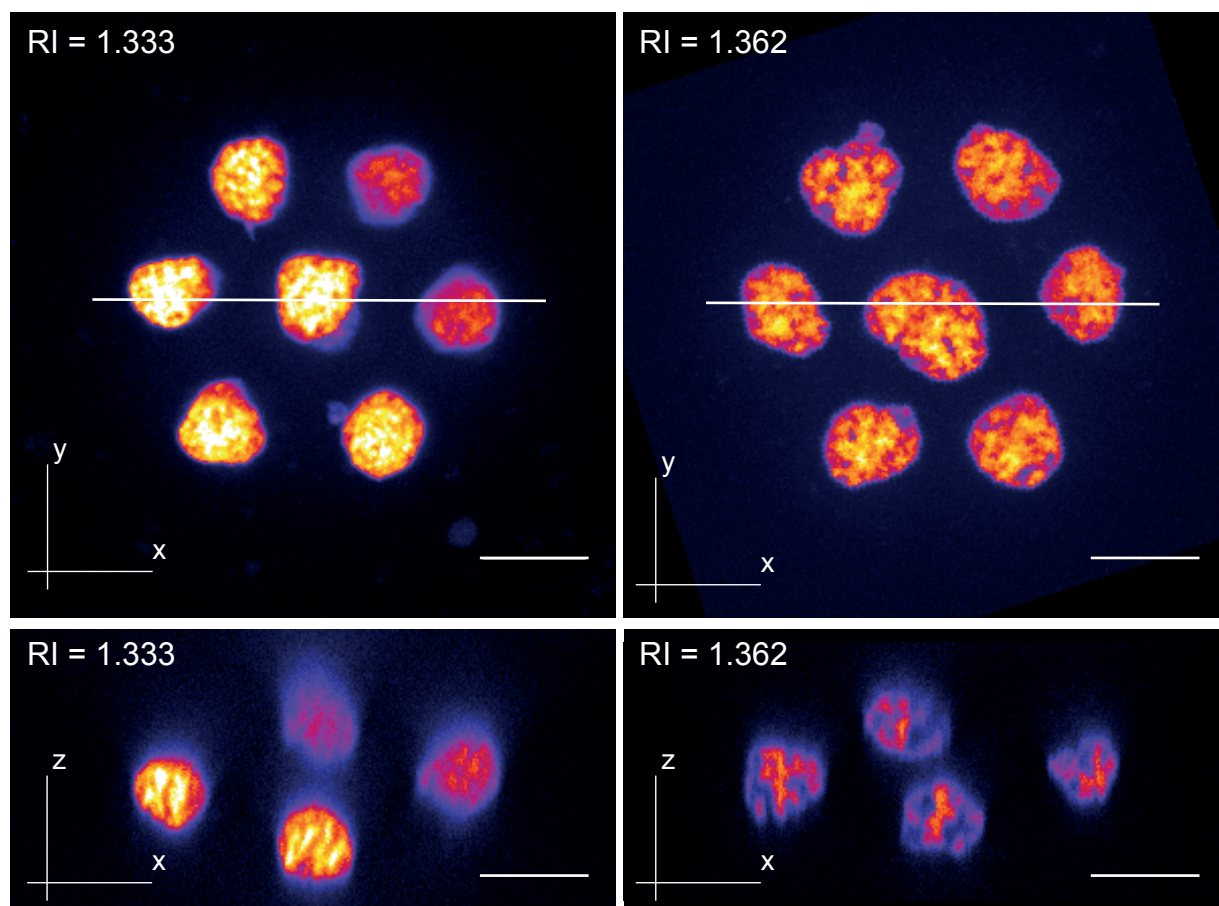

**Figure 3 - Figure Supplement 1**

Supplement: supp [file elife_poa_e27240_Figure_3_Figure_Supplement_1.pdf › elife_poa_e27240_Figure_3_Figure_Supplement_1.pdf]

RI = 1.333

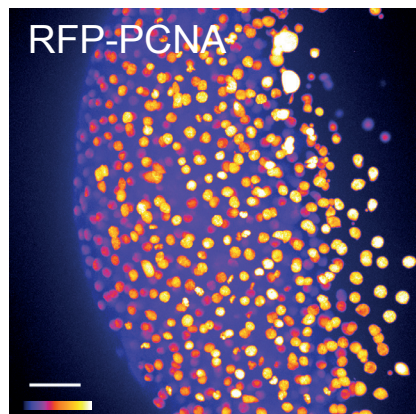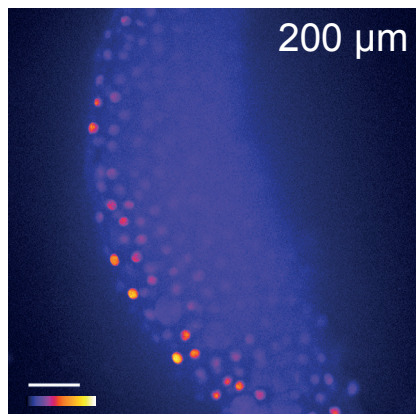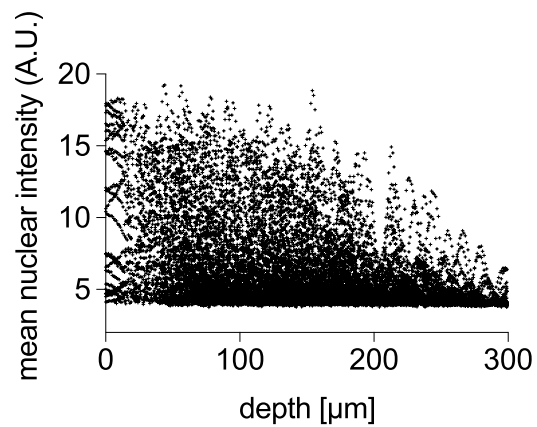

RI = 1.363

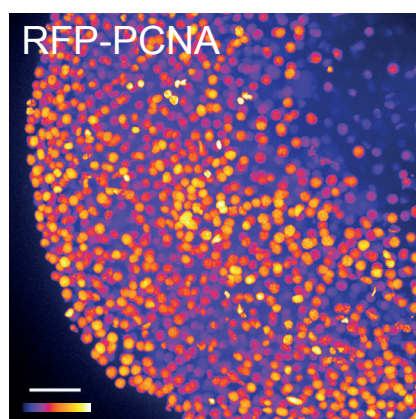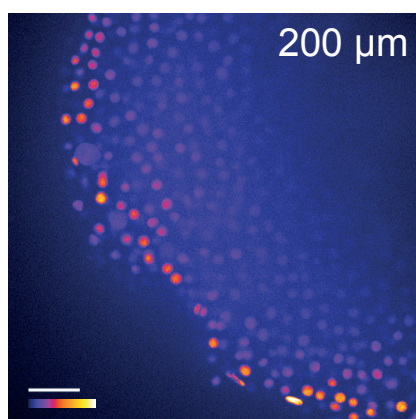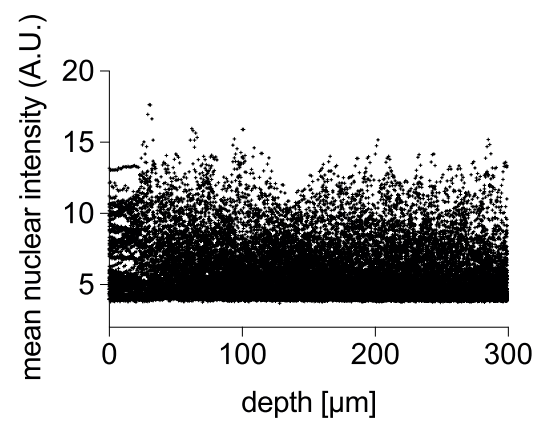

Figure 4 - Supplement 1

Supplement: supp [file elife_poa_e27240_Figure_4_Figure_Supplement_1.pdf › elife_poa_e27240_Figure_4_Figure_Supplement_1.pdf]
